# Supplementary material for: Ethnobotanical Study On Plants Used To Dye Traditional Costumes By The Baiku Yao Nationality of China
Source: Research Square preprint supplement (doi:10.21203/rs.3.rs-1010920/v1), 2021-10-28
Supplement: Supplementary file 2 [file 0ac9c4bedd233fa8bc967f75.xlsx]

## Sheet: 英文编目
	Family	Scientifie name	Chinese name	Yao name	Life-form	Habitat	Used part(s)	Application category	Effect	Dry or Fresh	Collecting time	Medicinal effect	CS	Voucher specimen	Commonly used areas
Cotton	Simaroubaceae	Ailanthus vilmoriniana Dode	Cì chòu chūn	Zhe gu zhou	Tree	Cultivated	Resin	Anti-dyeing	Prevent dye from dyeing on cotton cloth	Fresh	May-October		0.825464	HRC647	Yaoshan, Lihu and Bawei
	Acanthaceae	Strobilanthes cusia (Nees) Kuntze	Bǎn lán	Nong ze	Herb	Cultivated	Whole plant	Dyeing	Blue or black	Fresh	Autumn	Clearing away heat and toxic, eliminating phlegm	0.836443	HRC072、HRC254	Yaoshan, Lihu and Bawei
	Agrostidoideae	Oryza sativa L.	Dào	Cuo	Herb	Cultivated	Whole plant	Dyeing auxiliary	Enhance the adhesion of indigo	Dry	Autumn		0.247347	HRC648	Yaoshan, Lihu and Bawei
	Gleicheniaceae	Dicranopteris pedata (Houtt.) Nakaike	Máng qí	Bai qing	Herb	Wild	Whole plant	Dyeing auxiliary	Dyeing accelerant	Dry	Whole year		0.0541617	HRC715	Lihu
	Euphorbiaceae	Vernicia fordii (Hemsl.) Airy Shaw	Yóu tóng	La jiao ai	Tree	Cultivated	Peel	Dyeing auxiliary	Dyeing accelerant	Dry	Autumn and winter		0.123216	HRC253	Yaoshan, Lihu and Bawei
	Papilionaceae	Mucuna birdwoodiana Tutcher	Bái huā yóu má téng	Gu niu	Liana	Wild	Tender twigs	Late fixing materials	Increase color and brightness	Fresh	March-April	Enriching the blood, strengthening bones and tendons	0.124242	HRC572	Lihu
	Rhamnaceae	Rhamnus utilis Decne.	Dòng lǜ	Nong ya	Tree	Wild	Stem	Late fixing materials	Color retention	Dry / Fresh	Autumn	Aiding digestion, eliminating phlegm	0.59	HRC193, HRC334, HRC251	Yaoshan, Lihu and Bawei
	Dioscoreaceae	Dioscorea subcalva Prain et Burkill	Máo jiāo shǔ yù	Lu lu	Liana	Wild	Tuber	Late fixing materials	Increase the brightness and durability of dyed cotton cloth, and prevent fuzzing and discoloration	Fresh	Autumn	Improving blood circulation, hemostasis, relieving pain	0.31161	HRC490	Yaoshan, Lihu and Bawei
	Dioscoreaceae	Dioscorea cirrhosa Lour.	Shǔ liáng	Lu ya	Liana	Wild	Tuber	Late fixing materials	Increase color and brightness	Fresh	Autumn	Having insecticidal properties	0.576908	HRC98, HRC489	Yaoshan, Lihu and Bawei
	Meliaceae	Toona sinensis (Juss.) Roem.	Xiāng chūn	Wo you	Tree	Cultivated	Bark	Late fixing materials	Increase color and brightness	Dry / Fresh	June-September	Having insecticidal properties	0	HRC322	Bawei
	Lauraceae	Cinnamomum parthenoxylon (Jack) Meisner	Huáng zhāng	Nong hai	Tree	Wild	Bark	Late fixing materials	Increase color and brightness	Dry / Fresh	Autumn and winter		0.000751315	HRC323	Bawei
Silk	Rhamnaceae	Rhamnus utilis Decne. var. utilis	Dòng lǜ	Nong ya	Tree	Wild	Stem	Dyeing	Reddish brown	Dry / Fresh	Autumn	Aiding digestion, eliminating phlegm	0.588063	HRC193, HRC334, HRC251	Yaoshan, Lihu and Bawei
	Aquifoliaceae	Ilex chinensis Sims	Dōng qīng	Nong ze ya	Tree	Cultivated	Leaf	Dyeing	Reddish brown	Fresh	Autumn	Having bacteriostatic properties, healing burns, treating ulcers, having hemostatic properties	0.0768005	HRC780	Yaoshan
	Zingiberaceae	Curcuma longa L.	Jiāng huáng	Gang guai	Herb	Wild	Tuber	Dyeing	Yellow	Fresh	Autumn and winter	Stimulating menstrual flow, relieving pain	0.0443276	HRC552	Yaoshan, Lihu and Bawei
	Melastomataceae	Melastoma dodecandrum Lour.	Dì niè	~	Herb	Wild	Whole plant	Dyeing auxiliary	Toning	Fresh	Autumn		0	HRC781	Yaoshan
	Meliaceae	Chukrasia tabularis A. Juss.	Má liàn	~	Tree	Wild	Bark	Dyeing auxiliary	Reddish brown	Dry / Fresh	May-June	Stimulating menstrual flow, relieving pain	0.0165289	HRC74	Lihu
	Loganiaceae	Buddleja officinalis Maxim.	Mì méng huā	Ba cuo	Shrub	Wild	Flower	Dyeing auxiliary	Yellow	Dry / Fresh	Autumn	Lowering blood pressure,having hemostatic properties,reducing swelling	0.0605142	HRC645	Yaoshan, Lihu and Bawei
	Theaceae	Eurya tetragonoclada Merr. et Chun	Sì jiǎo líng	Nong cuo wa	Shrub	Wild	Leaf	Dyeing auxiliary	Reddish brown	Fresh	May-October	Clearing away heat and toxic, nourishing the liver to improve visual acuity	0.00375657	HRC483	Bawei
	Myrsinaceae	Myrsine semiserrata Wall.	Zhēn chǐ tiě zǐ	Nong cuo	Shrub	Wild	Stem and leaf	Dyeing	Reddish brown	Fresh	May-October	Clearing away heat and toxic	0	HRC487	Bawei
	Rubiaceae	Gardenia jasminoides Ellis	Zhī zǐ	Gua nong	Shrub	Wild	Fruit	Dyeing	Yellow	Dry / Fresh	Autumn and winter		0.09	HRC482, HRC250	Yaoshan, Lihu and Bawei
	Rutaceae	Murraya euchrestifolia Hayata	Dòu yè jiǔ lǐ xiāng	Dong zai	Shrub	Wild	Leaf	Late fixing materials	Reddish brown	Fresh	Autumn	Eliminating wind and removing dampness, relieving pain	0.066545	HRC646	Lihu
	Theaceae	Eurya groffii Merr.	Gǎng líng	Nong cuo wa	Shrub	Wild	Leaf	Late fixing materials	Reddish brown	Fresh	May-October	Eliminating phlegm, relieving cough, reducing swelling	0.0576694	HRC488	Bawei
	Symplocaceae	Symplocos lucida (Thunb.) Sieb. et Zucc.	Guāng liàng shān fán	Nong ze ya	Shrub	Wild	Leaf	Late fixing materials	Reddish brown	Fresh	May-October		0.15474	HRC672	Lihu
	Aquifoliaceae	Ilex kwangtungensis Merr.	Guǎng dōng dōng qīng	Nong ze ya	Tree	Cultivated	Leaf	Late fixing materials	Reddish brown	Fresh	May-October	Having bacteriostatic properties, healing burns, treating ulcers, having hemostatic properties	0.173137	HRC502, HRC252, HRC649	Yaoshan, Lihu and Bawei
